# Supplementary material for: Magnetic response properties of gaudiene – a cavernous and aromatic carbocage
Source: Royal Society of Chemistry journal article supplement (doi:10.1039/c6cp03808e), 2016-01-01
Supplement: c6cp03808e1.pdf [file c6cp03808e1.pdf]

-- Supporting Information --

## Magnetic Response Properties of Gaudiene - A Cavernous and Aromatic Carbocage

Markus Rauhalhti<sup>a</sup>, Alvaro Muñoz-Castro<sup>b,\*</sup>, Dage Sundholm<sup>a,\*</sup>

<sup>a</sup> Department of Chemistry, University of Helsinki, P.O. Box 55 (A. I. Virtanens plats 1), FIN-00014, Finland.

<sup>b</sup> Laboratorio de Química Inorgánica y Materiales Moleculares, Universidad Autónoma de Chile, El Llano Subercaseaux 2801, Santiago, Chile.

### Content

**Figure S1.** Schematic representation of the energy levels of the  $\pi$  electrons for compounds **2** and **3**.

**Figure S2.** Representation of shielding cone from benzene, under an applied field.

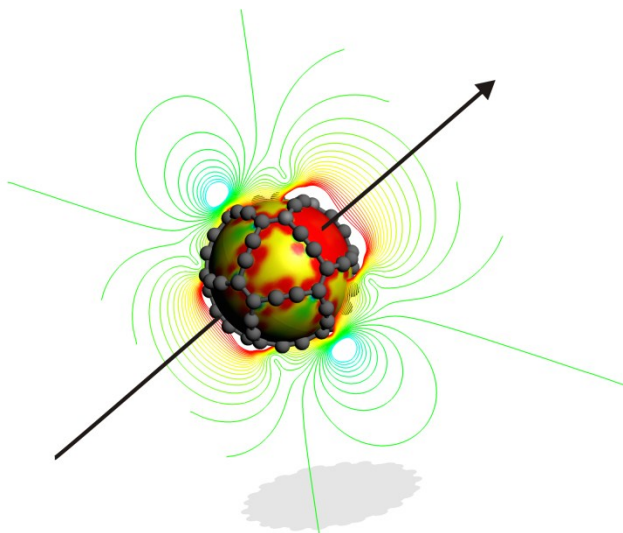

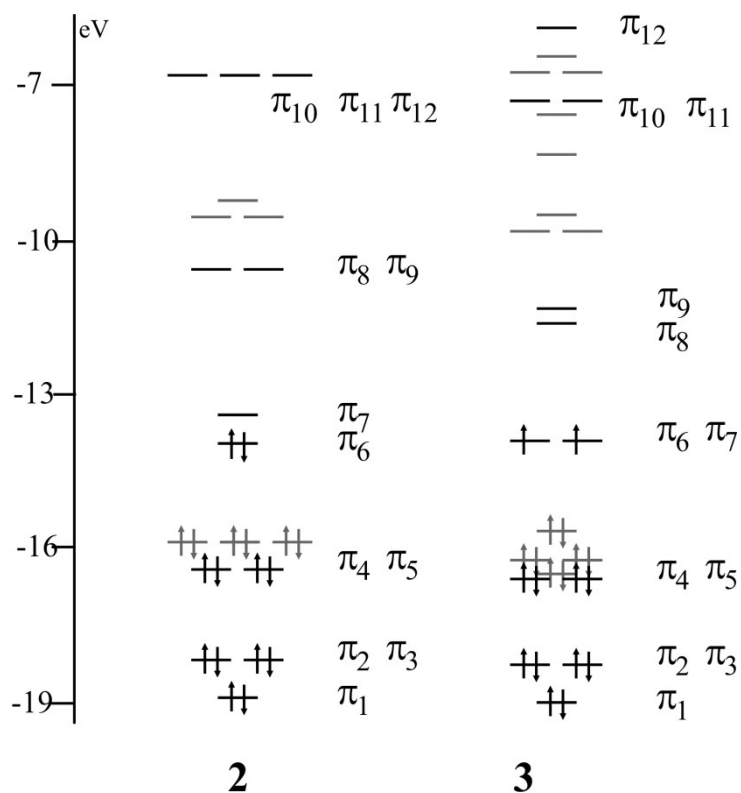

**Figure S1.** Schematic representation of the energy levels of the  $\pi$  electrons is given in the supporting information for compounds **2** and **3**. Grey color, indicates non- $\pi$  levels.

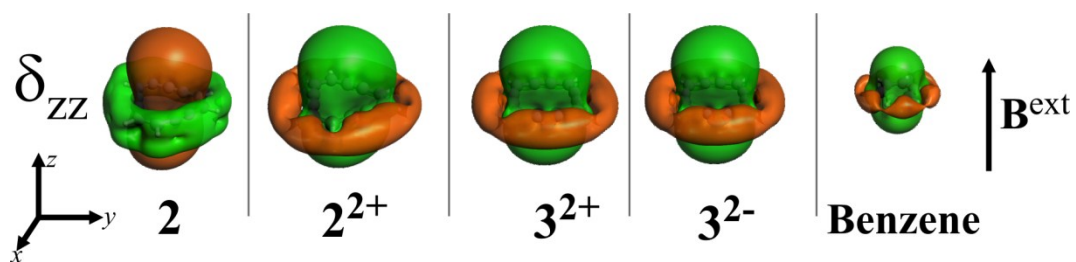

**Figure S2.** Representation of shielding cones studied here in comparison to, under an applied field. Color code: Green: Shielding; Orange: Deshielding.
